# Supplementary figures and images for: Preventing the Distortion of CoO6 Octahedra of LiCoO2 at High-Voltage Operation of Lithium-Ion Battery: An Organic Surface Reinforcement
Source: MDPI journal article supplement (doi:10.3390/polym15092211), 2023-05-06

# **Supporting Material**

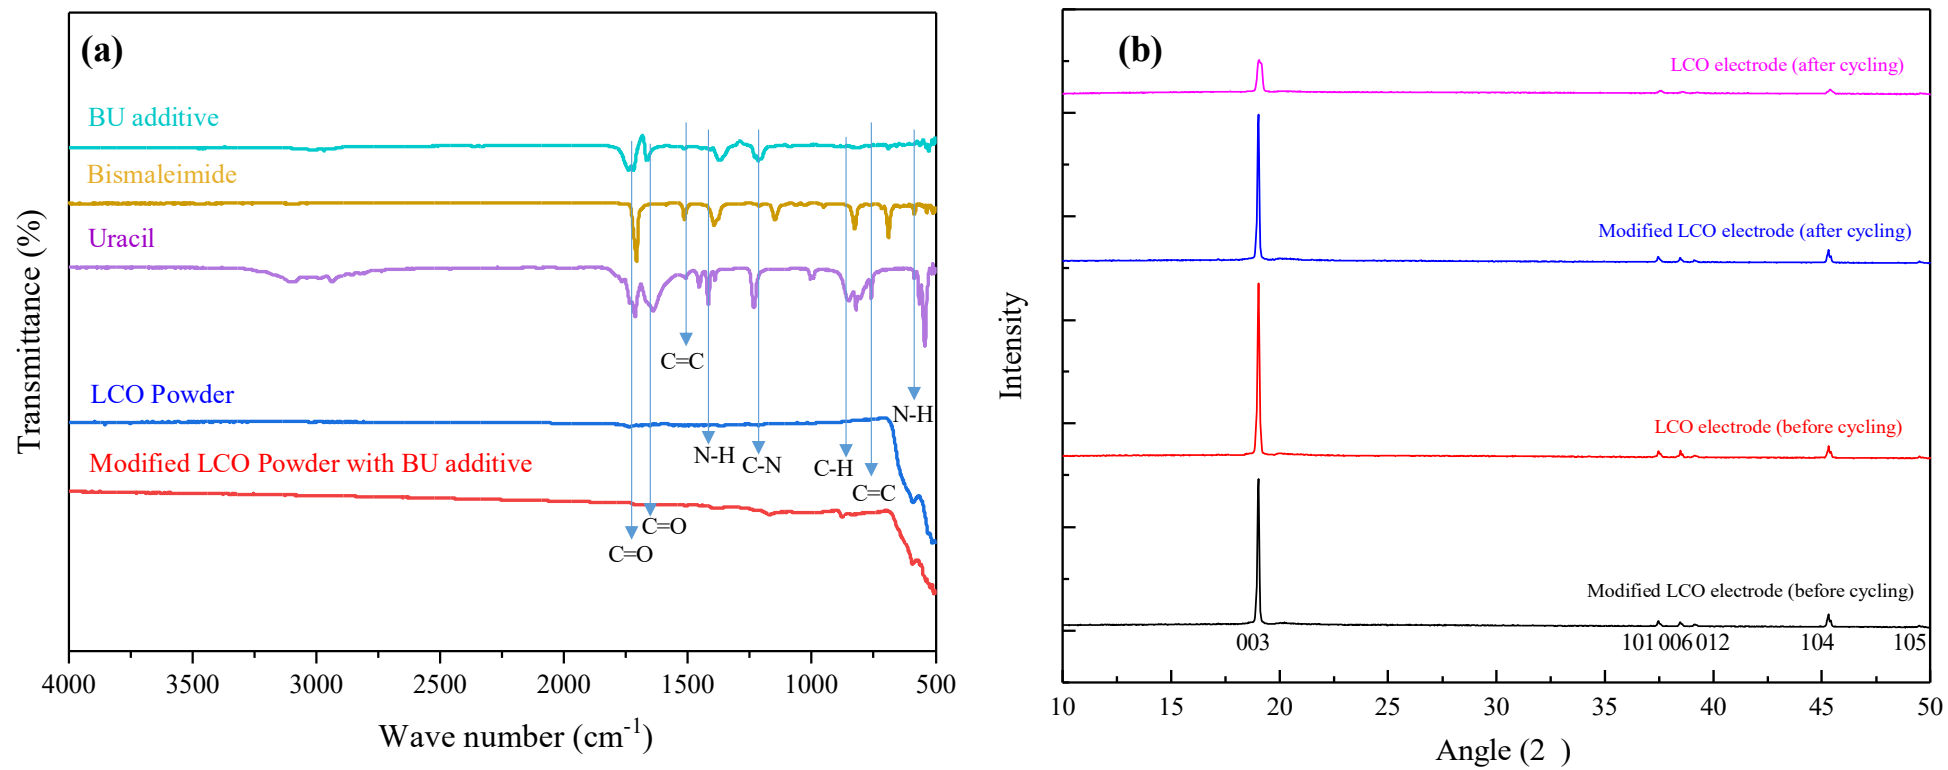

**Figure S1** (a) FTIR spectra of powders and (b) XRD pattern of electrodes.

Supplement: s1 [file s1]
